Anesthesiology

82:713-722, 1995

© 1995 American Society of Anesthesiologists, Inc.

J. B. Lippincott Company, Philadelphia

## Effects of Hypothermia, Potassium, and Verapamil on the Action Potential Characteristics of Canine Cardiac Purkinje Fibers

Juraj Sprung, M.D., Ph.D.,\* Adam Laszlo, M.D.,† Lawrence A. Turner, M.D.,‡ John P. Kampine, M.D., Ph.D.,§  
Zeljko J. Bosnjak, Ph.D.¶

**Background:** Hypothermia may induce hypokalemia and increase intracellular  $Ca^{2+}$  by affecting serum  $K^+$  and  $Ca^{2+}$  fluxes across the cell membrane. These ionic alterations may significantly change the electrophysiologic characteristics of the cardiac action potential and may induce cardiac arrhythmias. The current study was undertaken to determine whether electrophysiologic changes in Purkinje fibers induced by hypothermia could be reversed by manipulating the extracellular  $K^+$  and transmembrane  $Ca^{2+}$  fluxes by  $Ca^{2+}$  channel blockade with verapamil.

**Methods:** A conventional microelectrode method was used to determine the effects of hypothermia ( $32 \pm 0.5^\circ C$  and  $28 \pm 0.5^\circ C$ ) and various external  $K^+$  concentrations ( $[K^+]_o$ ) (2.3, 3.8, and 6.8 mM) on maximum diastolic potential, maximum rate of phase 0 depolarization ( $V_{max}$ ), and action potential duration (APD) at 50% ( $APD_{50}$ ) and at 95% ( $APD_{95}$ ) repolarization in isolated canine cardiac Purkinje fibers. To evaluate the contribution of the slow inward  $Ca^{2+}$  current to action potential changes in hypothermia, the experiments were repeated in the presence of the  $Ca^{2+}$ -channel antagonist verapamil ( $1 \mu M$ ).

**Results:** Variations of  $[K^+]_o$  induced the expected shifts in maximum diastolic potential, and hypothermia ( $28^\circ C$ ) induced moderate depolarization, but only when  $[K^+]_o$  was  $\geq 3.9$  mM ( $P < 0.05$ ). Hypothermia decreased  $V_{max}$  at all  $[K^+]_o$  studied ( $P < 0.05$ ). Regardless of the temperature,  $V_{max}$  was not affected by verapamil when  $[K^+]_o$  was  $\leq 3.9$  mM, but at 6.8 mM  $[K^+]_o$  in hypothermia  $V_{max}$  was significantly lower in the presence of verapamil. Hypothermia increased both the  $APD_{50}$  and the  $APD_{95}$ . The effects of verapamil on APD were temperature and  $[K^+]_o$  dependent; between  $37^\circ C$  and  $28^\circ C$  with 2.3 mM  $[K^+]_o$  in the superfusate, verapamil did not affect APD. At  $28^\circ C$  in the presence of verapamil, the  $APD_{50}$  and  $APD_{95}$  decreased only if the  $[K^+]_o$  was  $\geq 3.9$  mM.

**Conclusions:** Verapamil and  $K^+$  supplementation in hypothermia may exert an antiarrhythmic effect, primarily by reducing the dispersion of prolonged APD. (Key words: Calcium channel, antagonist: verapamil. Heart, electrophysiology: action potential duration; maximum diastolic potential; maximum rate of phase 0 depolarization. Ions, potassium: extracellular. Temperature: hypothermia.)

\* Staff Anesthesiologist, Department of Anesthesiology, Cleveland Clinic Foundation.

† Postdoctoral Research Fellow, Department of Anesthesiology, Medical College of Wisconsin.

‡ Associate Professor, Department of Anesthesiology, Medical College of Wisconsin.

§ Professor, Departments of Anesthesiology and Physiology; Chair, Department of Anesthesiology, Medical College of Wisconsin.

¶ Professor, Departments of Anesthesiology and Physiology; Director, Laboratory of Cellular Biology, Medical College of Wisconsin.

Received from the Departments of Anesthesiology and Physiology, Medical College of Wisconsin, Milwaukee, Wisconsin, and the Department of Anesthesiology, Cleveland Clinic Foundation, Cleveland, Ohio. Accepted for publication November 3, 1994. Supported by the Society of Cardiovascular Anesthesiologists Starter Grant (to JS), National Institutes of Health grant HL-39776 (to ZJB), VA Medical Research Funds, and Anesthesiology Research Training grant GM08377.

Address reprint requests to Dr. Bosnjak: Department of Anesthesiology, Medical College of Wisconsin, 8701 West Watertown Plank Road, Milwaukee, Wisconsin 53226.

HYPOTHERMIA can occur accidentally after exposure to a cold environment or operating room or may be intentionally induced to protect tissues against hypoxia during surgery.<sup>1</sup> Various cardiac arrhythmias, including ventricular fibrillation and asystole, occur at temperatures below about  $30^\circ C$ .<sup>2</sup> An anesthesiologist may be faced with this problem in the critical care setting while treating the patient with accidental hypothermia, intraoperatively during recovery from low temperature cardioplegia, or even during irrigation of the thoracic cavity with cold solution.<sup>3</sup> Major electrocardiographic manifestations of hypothermia include decreased myocardial conduction velocity with increases in PR and QT intervals and QRS complex duration.<sup>2</sup> At least in part, these changes can be attributed to alterations in the electrophysiologic properties of the cardiac Purkinje fibers<sup>4</sup> or serum electrolyte changes<sup>5</sup> induced by the hypothermia.<sup>6,7</sup> *In vivo*, nonhomogeneous tissue cooling slows action potential propagation and can induce differences in repolarization at various sites in the ventricular conducting system.<sup>8</sup> This repolarization



heterogeneity facilitates nonuniform distribution of impulse conduction throughout the myocardium and may result in reentrant arrhythmias.<sup>8-11</sup> In addition, low temperature modifies cation conductance across cell membranes<sup>12</sup> and may result in clinically significant hypokalemia, which can be attributed to a temperature-mediated redistribution of  $K^+$  among body compartments.<sup>6,7</sup> The resting membrane potential of cardiac Purkinje fibers may depolarize in deep hypothermia,<sup>13</sup> and an increase in the action potential duration (APD) is seen even during mild hypothermia and hypokalemia.<sup>14</sup> These electrophysiologic changes can depress impulse conduction and may induce reentry arrhythmias, abnormal forms of automaticity, and heart block.<sup>5</sup>

The exact mechanism by which hypothermia increases cardiac irritability is unknown, but the hypothermia-induced electrophysiologic changes in Purkinje fiber action potentials may be involved. In addition to affecting  $K^+$  homeostasis,<sup>6,7</sup> hypothermia also increases intracellular myocardial  $Ca^{2+}$  concentration ( $[Ca^{2+}]_i$ ).<sup>15</sup> Inhibition of the  $Na^+-K^+$  pump activity by low temperature leads to an increase in intracellular  $Na^+$  concentration ( $[Na^+]_i$ ), which may promote  $Ca^{2+}$  influx during the plateau of the action potential or oppose a  $Ca^{2+}$  efflux during diastole by the  $Na^+-Ca^{2+}$  exchange mechanism.<sup>16</sup> The excessive accumulation of intracellular  $Ca^{2+}$ , termed " $Ca^{2+}$  overload,"<sup>17</sup> may result in delayed afterdepolarizations, causing severe cardiac arrhythmias.<sup>5,17-19</sup> Furthermore, it has been suggested that hypothermia, by delaying inactivation of the inward  $Ca^{2+}$  current ( $I_{Ca}$ ) and maintaining the  $I_{Ca}$  for a longer time, contributes to action potential lengthening and arrhythmias based on abnormal impulse propagation.<sup>20</sup>

We hypothesized that if increased  $[Ca^{2+}]_i$  underlay important changes in electrophysiologic characteristics of Purkinje fibers in hypothermia, especially prolongation of the APD, we should be able to alter their course with a  $Ca^{2+}$ -channel blocking agent. Because hypothermia alters  $K^+$  homeostasis,<sup>6,7</sup> we also examined the effects of hypothermia on action potential characteristics over the wide range of external  $[K^+]$  ( $[K^+]_o$ ) in the absence and presence of verapamil. The reduction of APD with verapamil, if present, might be expected to reduce the incidence of hypothermia-induced ar-

rhythmias, specifically dysrhythmias based on regional differences in myocardial repolarization.

## Materials and Methods

This study was approved by the Medical College of Wisconsin Animal Care Committee and conformed with standards set forth in the *Guide for Care and Use of Laboratory Animals*.#

Adult mongrel dogs (10–22 kg, of either sex) ( $n = 45$ ) were anesthetized with 30 mg/kg pentobarbital sodium. The heart was quickly excised, and the anterior false tendon with attached papillary muscle from the left ventricle was removed and immersed in modified Krebs' solution (22°C) equilibrated with 97%  $O_2$  and 3%  $CO_2$ . Small ( $<1\text{-cm}^2$ ) preparations with free-running strands of Purkinje fibers were dissected from this tissue and pinned to the silicone elastomere floor of a 2-ml chamber and superfused at a rate of 4 ml/min with modified Krebs' solution (37°C) containing 2.3, 3.9, or 6.8 mM KCl with or without 1  $\mu\text{M}$  verapamil and equilibrated with a 97%  $O_2$ –3%  $CO_2$  gas mixture. The millimolar composition of Krebs' solution was 137 NaCl, 12  $NaHCO_3$ , 1.8  $NaH_2PO_4$ , 1.8  $CaCl_2$ , 0.5  $MgCl_2$ , 5.5 glucose, and 0.05 EDTA, with a pH of 7.4.

Each preparation was stimulated at a constant rate (1 Hz) with the use of bipolar-silver wire endocardial surface electrodes. The stimuli were square-wave pulses lasting 2 ms at 1.5 times threshold. Transmembrane action potentials were recorded with conventional microelectrode techniques. Action potential changes stabilized within 5–8 min. Glass microelectrodes (15–30-M $\Omega$  resistance) were coupled by Ag–AgCl wire to a preamplifier (World Precision Instruments, New Haven, CT). Action potential signals were recorded on frequency-modulated tape (AR Vetter, Rebersburg, PA) for later analysis of maximum diastolic potential (MDP), maximum rate of phase 0 depolarization ( $V_{max}$ ), and APD at 50% ( $APD_{50}$ ) and at 95% ( $APD_{95}$ ) repolarization. These values were displayed and measured electronically directly off the digital oscilloscope (Nicolet 310). The  $V_{max}$  was determined with a differentiator exhibiting a linear response from 100–1,000 V/s. The "zero" potential was obtained at the beginning and at the end of the experiments by withdrawing the microelectrode from the inside of the fiber. Because the ground connection between the bath and the circuit was made through a direct Ag–AgCl connection, the change in temperature may slightly influence the half cell potential in the bath, and this change will sum

# *Guide for Care and Use of Laboratory Animals*. Publication 85-23. Bethesda, MD, Public Health Services, National Institutes of Health, revised 1985.



with the real MDP changes. To verify the significance of this phenomenon we performed additional experiments ( $n = 8$ ) in which the microelectrode was placed into the bath, the temperature was changed from 37°C to 28°C, and the Ag–AgCl bath junction potential change was measured. The half cell potential caused a hyperpolarization to be measured by the microelectrode over this temperature range by  $-2.1 \pm 0.02$  mV and  $-4.2 \pm 0.05$  mV at 32°C and 28°C respectively. All measured MDP values at 32°C and 28°C were corrected for the above differences, by subtracting the temperature-induced bath potential from the actual measured potential, and all the statistical analyses were performed with these corrected values.

The tissue bath was surrounded by a thermostatically controlled water bath, maintained at a constant temperature of  $37 \pm 0.02^\circ\text{C}$ . The low bath superfusate temperatures ( $32$  and  $28 \pm 0.5^\circ\text{C}$ ) were attained by readjusting the setting of the thermostat. The temperature in the tissue bath was gradually decreased from 37°C to 25°C over a 20–30-min period. The temperature of the solution was measured by a small, rapidly responding, custom made thermistor probe placed less than 2 mm from the preparation. The fluid level in the chamber was kept at a constant height (4 mm) by continuous suction.

The preparations were allowed to equilibrate for about 1 h. To determine the effects of hypothermia on action potential characteristics, action potentials were recorded at 37°C, 32°C, and 28°C ( $\pm 0.5^\circ\text{C}$ ). To determine the effects of various  $[\text{K}^+]_o$  on action potentials, experiments were performed with 2.3, 3.9, and 6.8 mM  $[\text{K}^+]_o$  in the superfusate. Verapamil (Sigma, St. Louis, MO) prepared as stock solution (100  $\mu\text{M}$ ) was added to measured volumes to achieve the desired 1  $\mu\text{M}$  concentration in the superfusate. The same set of action potential measurements were performed with 1  $\mu\text{M}$  verapamil in the superfusate. Tissues were exposed to each  $[\text{K}^+]_o$  and to verapamil (1  $\mu\text{M}$ ) for 20 min before measurement of action potential characteristics.

Data are expressed as means  $\pm$  standard error of the mean. Statistical analysis was performed by paired and unpaired  $t$  tests and with one-way analysis of variance (analysis of variance repeated measures and factorial analysis), as appropriate, with  $P < 0.05$  considered statistically significant.

## Results

Typical effects of hypothermia on the action potential in canine Purkinje fibers are illustrated in the upper

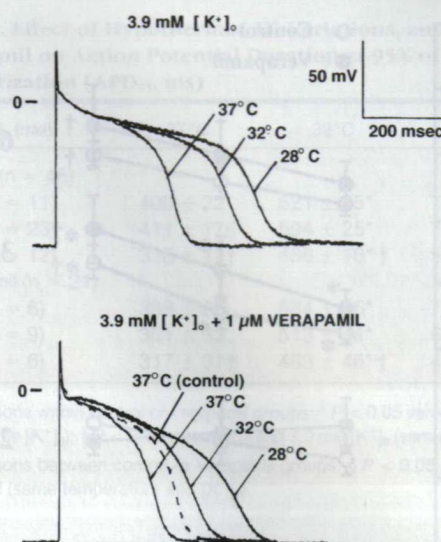

**Fig. 1.** Effect of hypothermia on action potential of canine cardiac Purkinje fiber superfused with normal Krebs' solution (*top*) and in the presence of verapamil (*bottom*). See text for details.

panel of figure 1. Each preparation was stimulated at a constant rate of 1 Hz. Recordings were taken from the same cell at various temperatures at a  $[\text{K}^+]_o$  of 3.9 mM. Hypothermia significantly increased APD. The bottom panel of figure 1 shows the changes of action potential in hypothermia in the presence of 1  $\mu\text{M}$  verapamil in the superfusate. In the presence of verapamil, the Purkinje fiber's action potential is shorter than at the same temperature without the drug (dashed action potential was recorded at 37°C in the absence of verapamil). The slope of phase 2 repolarization is increased by verapamil, a finding that is consistent with the blockade of a slow inward current such as that carried by a  $\text{Ca}^{2+}$  ion. Hypothermia, on the other hand, appears to decrease the slope of phase 2, suggesting that low temperature affects the  $\text{Ca}^{2+}$ -dependent ionic mechanisms in opposite direction.

### Maximum Diastolic Potential

The effects of two stages of hypothermia (32°C and 28°C) on the MDPs of Purkinje fibers were recorded during the exposure to low (2.3 mM), normal (3.9 mM), and high (6.8 mM)  $[\text{K}^+]_o$  in the superfusate (fig. 2). MDPs were higher (hyperpolarized) at low, and lower (depolarized) at high  $[\text{K}^+]_o$  than at normal  $[\text{K}^+]_o$  ( $P < 0.05$ ), regardless of the temperature. During the 20–30 min of gradual cooling from 37°C to 28°C, MDP



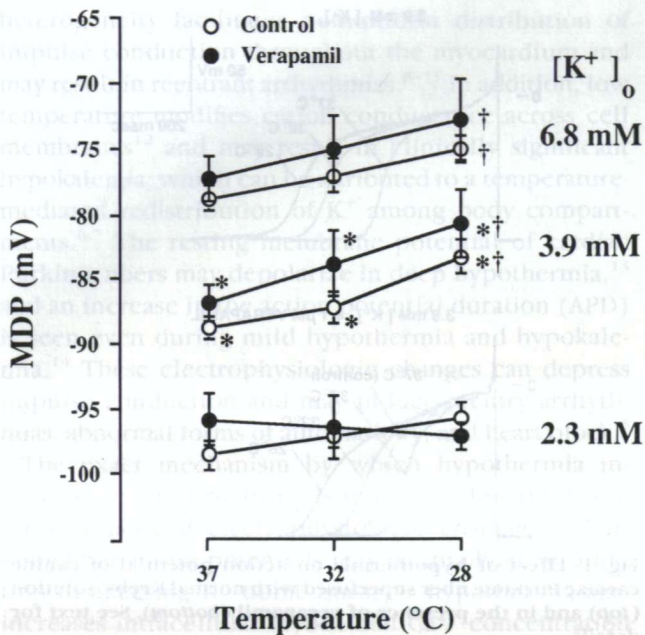

Fig. 2. Effect of hypothermia and K<sup>+</sup> variations on maximum diastolic potential (MDP) of Purkinje fiber action potentials with and without verapamil in the superfusate. \*P < 0.05 versus 2.3 and 6.8 mM external [K<sup>+</sup>]<sub>o</sub> at same temperature. †P < 0.05 versus 37°C at same [K<sup>+</sup>]<sub>o</sub>.

decreased at normal and high [K<sup>+</sup>]<sub>o</sub> (P < 0.05), and did not change at low [K<sup>+</sup>]<sub>o</sub>.

At 37°C and in the presence of verapamil MDP was lower (difference not significant, P > 0.05 vs. control; fig. 2). In hypothermia and at [K<sup>+</sup>]<sub>o</sub> ≥ 3.9 mM loss of membrane potential was parallel to this of control Purkinje fibers, and reached significant depolarization at 28°C (P < 0.05). At [K<sup>+</sup>]<sub>o</sub> 2.3 mM there was no effect of temperature on MDP in verapamil-superfused Purkinje fibers.

Maximum Rate of Phase 0 Depolarization

The effects of hypothermia, K<sup>+</sup> variation, and verapamil on V<sub>max</sub> are summarized in figure 3. Hypothermia decreased V<sub>max</sub> at each [K<sup>+</sup>]<sub>o</sub> (P < 0.05). Despite significant differences in MDP at various [K<sup>+</sup>]<sub>o</sub> at 37°C (fig. 2), the respective V<sub>max</sub> values were not different (fig. 3), although there were trends for V<sub>max</sub> to be lower at 6.8 and higher at 2.3 mM [K<sup>+</sup>]<sub>o</sub> than at 3.9 mM [K<sup>+</sup>]<sub>o</sub> (P > 0.05). At [K<sup>+</sup>]<sub>o</sub> ≤ 3.9 mM with verapamil in the superfusate no additional effect, besides that of temperature, was noted on V<sub>max</sub> (fig. 3). At 6.8 mM [K<sup>+</sup>]<sub>o</sub> in hypothermia, V<sub>max</sub> was lower in the presence of verapamil (P < 0.05).

To quantify the effects of changing MDP on V<sub>max</sub>, we examined eight additional Purkinje fiber preparations by gradually increasing [K<sup>+</sup>]<sub>o</sub> in the superfusate from 0.8 to 10 mM; MDP and V<sub>max</sub> values were measured at 37°C and at 30°C (fig. 4). At both temperatures MDP decreased (less negative) directly with increasing [K<sup>+</sup>]<sub>o</sub> between 2.3 and 10 mM (P < 0.05); below 2.3 mM MDP did not further change (P > 0.05). Only between 3.9 and 8.5 mM [K<sup>+</sup>]<sub>o</sub> MDP was lower at 30°C (P < 0.05). V<sub>max</sub> decreased moderately between 2.3 and 6.8 mM [K<sup>+</sup>]<sub>o</sub>, followed by a rapid decrease when [K<sup>+</sup>]<sub>o</sub> increased above 6.8 mM (MDP ≤ -80 mV) (fig. 4). Compared with 2.3 mM [K<sup>+</sup>]<sub>o</sub>, at 0.8 mM [K<sup>+</sup>]<sub>o</sub> there was a

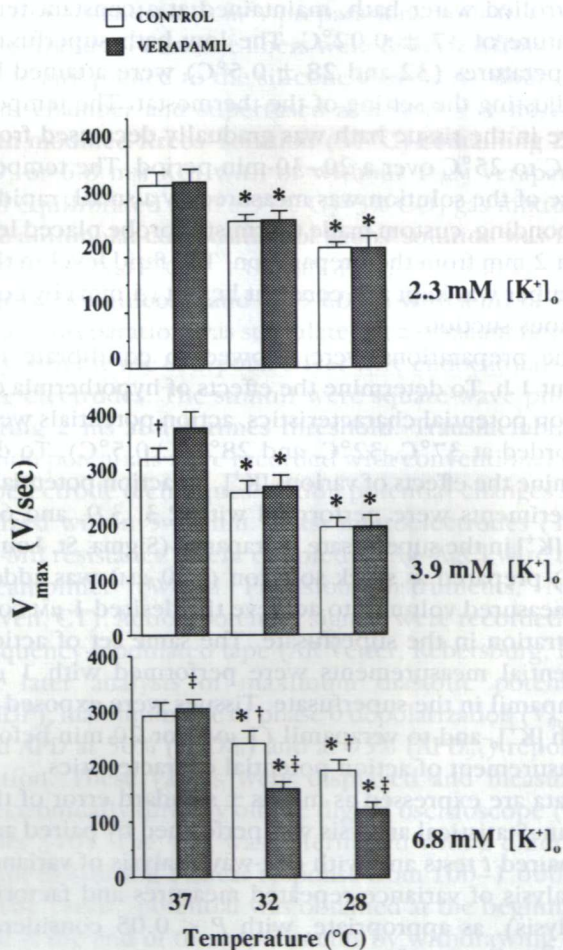

Fig. 3. Effect of hypothermia and K<sup>+</sup> variations on the maximum rate of phase 0 depolarization (V<sub>max</sub>) of Purkinje fiber action potentials with and without verapamil in the superfusate. \*P < 0.05 versus 37, 32, and 28°C; †P < 0.05 versus verapamil; ‡P < 0.05 versus 2.3 and 3.9 mM external [K<sup>+</sup>] + verapamil.

Downloaded from http://aesaj.silverchair.com/anesthesiology/article-pdf/82/3/713/387163/0000542-199503000-00013.pdf by guest on 19 April 2024



## HYPOTHERMIA, POTASSIUM, VERAPAMIL, AND ACTION POTENTIAL

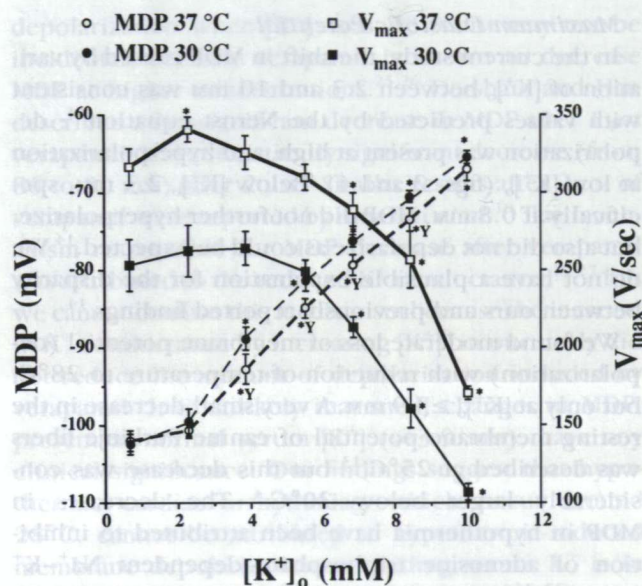

Fig. 4. Relation between maximum diastolic potential (MDP) and maximum rate of phase 0 depolarization ( $V_{max}$ ) of Purkinje fiber action potentials at 37°C and at 30°C during the gradual increase in external  $[K^+]_o$  from 0.8 to 10 mM. \* $P < 0.05$  MDP or  $V_{max}$  versus lower  $[K^+]_o$ . † $P < 0.05$  MDP<sub>37°C</sub> versus MDP<sub>30°C</sub> at same  $[K^+]_o$ .

significant decrease in  $V_{max}$  at 37°C, and no change in  $V_{max}$  at 30°C. By varying the  $[K^+]_o$ ,  $V_{max}$  at 37°C and 30°C resulted in similar pattern of changes, yet amplitudes were different.

#### Action Potential Duration

Hypothermia increased early (APD<sub>50</sub>) and late (APD<sub>95</sub>) stages of repolarization (tables 1 and 2). Fig-

Table 1. Effect of Hypothermia,  $K^+$  Variations, and Verapamil on Action Potential Duration at 50% of Repolarization (APD<sub>50</sub>, ms)

| $[K^+]_o$ (mM)     | 37°C     | 32°C       | 28°C        |
|--------------------|----------|------------|-------------|
| Control (n = 46)   |          |            |             |
| 2.3 (n = 11)       | 216 ± 12 | 321 ± 21*  | 393 ± 27*   |
| 3.9 (n = 23)       | 218 ± 9  | 314 ± 14*  | 367 ± 17*§  |
| 6.8 (n = 12)       | 166 ± 7† | 235 ± 10*† | 297 ± 12*†§ |
| Verapamil (n = 21) |          |            |             |
| 2.3 (n = 6)        | 213 ± 18 | 334 ± 30*  | 376 ± 16*   |
| 3.9 (n = 9)        | 194 ± 16 | 287 ± 21*  | 293 ± 20*‡  |
| 6.8 (n = 6)        | 139 ± 9† | 187 ± 7*†  | 172 ± 16*†  |

Comparisons within control or verapamil groups: \* $P < 0.05$  versus 37, 32, and 28°C (same  $[K^+]_o$ ); † $P < 0.05$  versus 2.3 and 3.9 mM  $[K^+]_o$  (same temperature); ‡ $P < 0.05$  versus 2.3 or 6.8 mM  $[K^+]_o$  (same temperature).

Comparisons between control or verapamil groups: § $P < 0.05$  control versus verapamil (same temperature and  $[K^+]_o$ ).

Table 2. Effect of Hypothermia,  $K^+$  Variations, and Verapamil on Action Potential Duration at 95% of Repolarization (APD<sub>95</sub>, ms)

| $[K^+]_o$ (mM)     | 37°C      | 32°C       | 28°C        |
|--------------------|-----------|------------|-------------|
| Control (n = 46)   |           |            |             |
| 2.3 (n = 11)       | 409 ± 22  | 621 ± 35*  | 756 ± 42*   |
| 3.9 (n = 23)       | 411 ± 17§ | 594 ± 25*  | 712 ± 27*§  |
| 6.8 (n = 12)       | 328 ± 12† | 456 ± 16*† | 563 ± 24*†§ |
| Verapamil (n = 21) |           |            |             |
| 2.3 (n = 6)        | 399 ± 28  | 584 ± 46*  | 768 ± 49*   |
| 3.9 (n = 9)        | 351 ± 32  | 513 ± 44*  | 606 ± 60*   |
| 6.8 (n = 6)        | 317 ± 31† | 463 ± 46*† | 462 ± 45*†  |

Comparisons within control or verapamil groups: \* $P < 0.05$  versus 37, 32, and 28°C (same  $[K^+]_o$ ); † $P < 0.05$  versus 2.3 and 3.9 mM  $[K^+]_o$  (same temperature).

Comparisons between control or verapamil groups: § $P < 0.05$  control versus verapamil (same temperature and  $[K^+]_o$ ).

ures 5 and 6 compare the relative changes in APD<sub>50</sub> and APD<sub>95</sub> at various temperatures and  $[K^+]_o$  with and without verapamil in the superfusate. In hypothermia the increase in APD<sub>50</sub> (at 28°C) and APD<sub>95</sub> (at 32°C and 28°C) was inversely related to  $[K^+]_o$ ; at 6.8 mM  $[K^+]_o$  in hypothermia APD<sub>50</sub> and APD<sub>95</sub> were always closest to normothermic control. Regardless of temperature, verapamil did not affect APD<sub>50</sub> or APD<sub>95</sub> at 2.3 mM  $[K^+]_o$ . At 28°C and  $[K^+]_o \geq 3.9$  mM verapamil significantly shortened the APD<sub>50</sub> (fig. 5) and the APD<sub>95</sub> (fig. 6). At 28°C and 6.8 mM  $[K^+]_o$  with verapamil, the

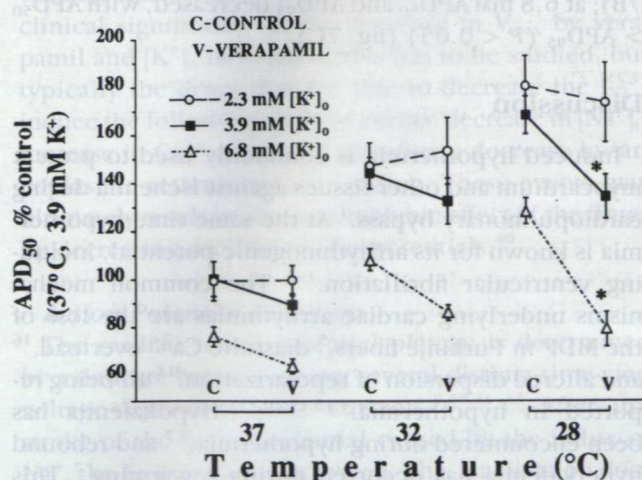

Fig. 5. Relative changes in action potential duration at 50% repolarization (APD<sub>50</sub>) by verapamil at various external  $[K^+]_o$  during cooling (control [C] values are normalized to the values obtained at 37°C and at 3.9 mM  $[K^+]_o$ ). \* $P < 0.05$  V (verapamil) versus C (control) at respective temperature.



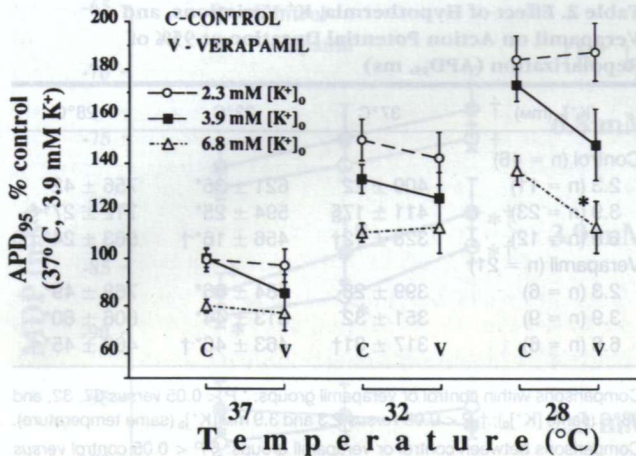

Fig. 6. Relative changes in action potential duration at 95% repolarization ( $APD_{95}$ ) by verapamil at various external  $[K^+]_o$  ( $[K^+]_o$ ) during cooling (control [C] values are normalized to the values obtained at 37°C and at 3.9 mM  $[K^+]_o$ ). \* $P < 0.05$  V (verapamil) versus C (control) at respective temperature.

$APD_{50}$  was 21% shorter whereas the  $APD_{95}$  was 12% longer than normothermic control. Without the verapamil at 28°C, there were no relative differences between the increases in  $APD_{50}$  and  $APD_{95}$ , regardless of the  $[K^+]_o$ , indicating that hypothermia prolonged early and late repolarization similarly (fig. 7). After verapamil was introduced to the superfusate, the relative changes in APD became dependent on the actual  $[K^+]_o$ ; at 2.3 mM  $[K^+]_o$   $APD_{50}$  and  $APD_{95}$  were unchanged (fig. 7A); at 3.9 mM  $[K^+]_o$  the primary effect was on  $APD_{50}$  (fig. 7B); at 6.8 mM  $[K^+]_o$   $APD_{50}$  and  $APD_{95}$  decreased, with  $APD_{50} > APD_{95}$  ( $P < 0.05$ ) (fig. 7C).

## Discussion

Induced hypothermia is commonly used to protect myocardium and other tissues against ischemia during cardiopulmonary bypass.<sup>1</sup> At the same time hypothermia is known for its arrhythmogenic potential, including ventricular fibrillation.<sup>1-3</sup> The common mechanisms underlying cardiac arrhythmias are the loss of the MDP in Purkinje fibers,<sup>5</sup> diastolic  $Ca^{2+}$  overload,<sup>16</sup> and altered dispersion of repolarization,<sup>11</sup> all being reported in hypothermia.<sup>4,13,14,20,21</sup> Hypokalemia has been encountered during hypothermia,<sup>6,7</sup> and rebound hyperkalemia has occurred during rewarming.<sup>7</sup> This study examined electrophysiologic alterations of MDP,  $V_{max}$ , and APD during hypothermia and hypothermic hypokalemia and their reversibility after verapamil treatment and  $K^+$  supplementation.

### Maximum Diastolic Potential

In the current study, the shift in MDP caused by variation of  $[K^+]_o$  between 2.3 and 10 mM was consistent with values predicted by the Nernst equation<sup>14</sup>: depolarization was present at high, and hyperpolarization at low  $[K^+]_o$  (figs. 2 and 4). Below  $[K^+]_o$  2.3 mM, specifically at 0.8 mM, MDP did not further hyperpolarize but also did not depolarize as could be expected.<sup>14</sup> We do not have a plausible explanation for the disparity between ours and previously reported findings.<sup>14</sup>

We found moderate loss of membrane potential (depolarization) with reduction of temperature to 28°C but only at  $[K^+]_o \geq 3.9$  mM. A very small decrease in the resting membrane potential of canine Purkinje fibers was described at 25°C,<sup>13</sup> but this decrease was considerably larger below 20°C.<sup>4</sup> The decreases in MDP in hypothermia have been attributed to inhibition of adenosine triphosphate-dependent  $Na^+-K^+$  pump.<sup>22-24</sup> In our study the  $Ca^{2+}$ -channel blockade with 1  $\mu$ M verapamil had no significant additional effect on MDP regardless of the temperature, and when  $[K^+]_o$  was  $\geq 3.9$  mM moderate depolarization at 28°C was parallel to that of control Purkinje fibers. This tendency toward

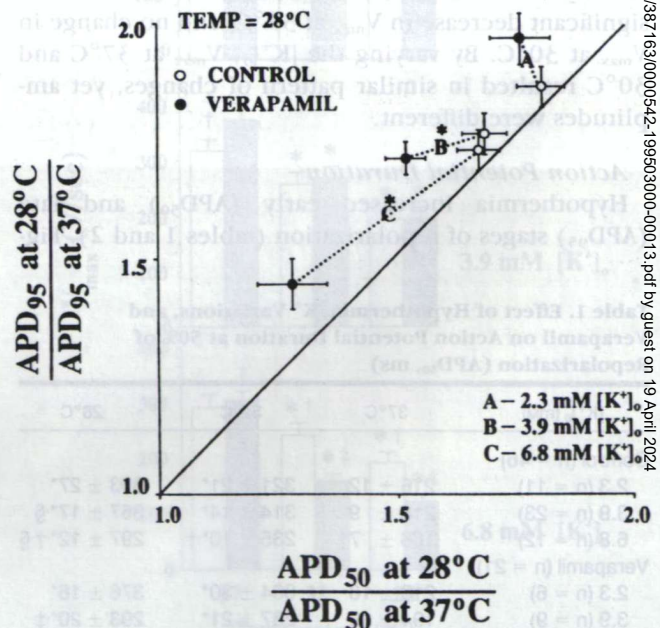

Fig. 7. Effect of verapamil (closed symbols) on the relative relation between action potential duration at 50% ( $APD_{50}$ ) and 95% ( $APD_{95}$ ) repolarization at 28°C at various external  $[K^+]_o$ . Values are normalized to their respective controls at 37°C (open symbols). \* $P < 0.05$  describes the significance of relative changes between action potential duration at 50% ( $APD_{50}$ ) versus 95% ( $APD_{95}$ ) repolarization after verapamil.



depolarization when  $[K^+]_o$  was  $\geq 3.9$  mM may not be incidental, because verapamil is known to decrease MDP at higher concentrations.<sup>25,26</sup> Dersham and Han described a nonsignificant decrease in MDP after 1  $\mu$ M verapamil, and a statistically significant decrease (from 86 to 80 mM) after 2  $\mu$ M.<sup>9</sup> Similar results after 2  $\mu$ M of verapamil were reported by Amerini *et al.*<sup>19</sup> The mechanism responsible for MDP decrease after verapamil was attributed to the reduced  $K^+$  conductance,<sup>19,27</sup> but we cannot confirm this mechanism because the increase in  $K^+$  conductance by increasing  $[K^+]_o$ <sup>8</sup> in our study did not reduce the amount of depolarization induced by verapamil. It is unlikely that small changes in MDP, present at normal serum  $[K^+]$  ( $\approx 3.9$  mM), have any clinical significance. Our findings suggest that hypothermic cardiac arrhythmias, which occur around 28°C, cannot be attributed to hypothermia-induced membrane depolarization, providing serum  $K^+$  is in normal range.

#### Maximum Rate of Phase 0 Depolarization

The magnitude of  $V_{max}$  is determined by the fast inward  $Na^+$  current ( $I_{Na}$ ), and has traditionally been used as an index of  $Na^+$  channel availability.<sup>28,29</sup> In our experiments, hypothermia decreased  $V_{max}$  (fig. 3), which may be explained by the temperature-mediated decrease in  $I_{Na}$ .<sup>24,30</sup> Hypothermia decreases  $Na^+$ - $K^+$  adenosine triphosphatase activity, which then results in increased  $[Na^+]_i$  and decrease in driving force for  $I_{Na}$ .<sup>31-33</sup> At  $[K^+]_o \leq 3.9$  mM in the normothermic and hypothermic states,  $Ca^{2+}$ -channel blockade with 1  $\mu$ M verapamil did not alter  $V_{max}$ . Although verapamil in lower concentrations has no significant effect on  $V_{max}$ ,<sup>9,25,34,35</sup> the  $Ca^{2+}$ -channel blockade may decrease  $V_{max}$  when given in higher concentrations.<sup>36,37</sup> However, at 6.8 mM  $[K^+]_o$  in hypothermia, we found that verapamil decreased  $V_{max}$  ( $P < 0.05$ ) (fig. 3). It is possible that the cumulative effect of hypothermic  $I_{Na}$  blockade, low MDP caused by hyperkalemia, and verapamil-induced inhibition of  $I_{Na}$ ,<sup>36,37</sup> possibly potentiated by low temperature, resulted in a reduction of  $V_{max}$ .

Because  $V_{max}$  is voltage-dependent we examined the relation between MDP and  $V_{max}$  by varying the  $[K^+]_o$  between 0.8 and 10 mM. Whereas the increase in  $[K^+]_o$  between 2.3 and 10 mM caused an almost linear decrease in MDP (depolarization), at less than 2.3 mM, MDP ceased to decrease further, consistent with a decrease in resting  $K^+$  conductance at low  $[K^+]_o$ .<sup>38</sup> The decrease in temperature from 37°C to 30°C induced

a leftward shift of the  $V_{max}$  curve. Although there was a decreasing trend,  $V_{max}$  did not significantly change when  $[K^+]_o$  was increased from 2.3 to approximately 6 mM, a finding that is consistent with the results described in figure 3. Therefore,  $V_{max}$  was not greatly affected when the voltage (MDP) was between -100 and -85 mV (2.3-6 mM  $[K^+]_o$ ), but was markedly decreased when MDP became less negative than -80 mV. In extreme hypokalemia (0.8 mM) at 37°C  $V_{max}$  significantly decreased, at least in part mirroring changes in the respective MDP. Our data suggest that during phase 0 of the stimulated action potential at MDP between -80 and -100 mV, the fraction of available  $Na^+$  channels remains relatively constant or only slightly increases as MDP becomes more negative. Thus, when MDP reaches -80 mV, the near-maximum capacity for  $Na^+$  influx through the fast  $Na^+$  channels may be reached (especially in hypothermia) and cannot be further increased by more negative MDP. The decrease in  $V_{max}$  when MDP drops below approximately -72 mV at 37°C and -80 mV at 30°C, is very abrupt. In addition, hypothermia significantly decreased  $V_{max}$  and less affected MDP. These findings are consistent with the existence of two mechanisms that may effect  $Na^+$ -channel kinetics: first, a temperature-dependent mechanism that is responsible for the decrease in  $V_{max}$  during cooling, and second, a voltage-dependent mechanism that is active only at MDP less negative than -80 mV. In deep hypothermia and at  $[K^+]_o$  6.8 mM, verapamil further decreased  $V_{max}$ , most likely by the interference with  $I_{Na}$  kinetics by voltage-dependent mechanism. The clinical significance of the decrease in  $V_{max}$  by verapamil and  $[K^+]_o$  in hypothermia has to be studied, but typically the drugs that are able to decrease the  $I_{Na}$ <sup>39</sup> induce the following chain of events: decrease in  $[Na^+]_i$ , increase in  $Ca^{2+}$  efflux and therefore a decrease in sarcoplasmic reticulum  $Ca^{2+}$  loading. These events may ultimately result in an antiarrhythmic effect of the drugs by decreasing oscillatory afterpotentials.<sup>40</sup>

#### Action Potential Duration

The cardiac action potential plateau is determined by a delicate balance among several distinct time- and voltage-dependent ionic currents.<sup>8,38,41-43</sup> After upstroke of the action potential caused by the influx of  $Na^+$ , the  $I_{Na}$  becomes inactivated. This inactivation does not lead to immediate repolarization, because the initial depolarization reduces the inwardly rectifying  $K^+$  conductance and opens voltage-gated  $Ca^{2+}$  channels thus permitting the intracellular influx of  $Ca^{2+}$  by the  $I_{Ca}$ .



During the action potential plateau, while membrane conductance for all ions is reduced, several currents help to maintain the transmembrane potential at around 0 mV, including  $I_{Ca}$ ,  $Na^+$  "window,"  $Cl^-$  and inward (anomalous) rectifying  $K^+$  currents. In addition, currents produced by the electrogenic  $Na^+-K^+$  pump and  $Na^+-Ca^{2+}$  exchange mechanism help to maintain the action potential plateau. The outward (delayed) rectifying  $K^+$  current ( $I_K$ ) and the inward rectifying  $K^+$  current are responsible for final rapid repolarization (phase 3). Details of the ionic basis of action potential are reviewed elsewhere.<sup>5,16,23,27,38,44,45</sup>

The electrophysiologic mechanisms responsible for the marked prolongation of APD seen in hypothermia are not fully understood, although mechanisms based on temperature dependence of  $I_K$ <sup>46</sup> and  $I_{Ca}$ <sup>47</sup> have been proposed. One important mechanism may be the hypothermia-induced reduction of  $I_K$ , which is a major contributor to membrane repolarization.<sup>46</sup> In addition, lengthened APD in hypothermia may be attributed to delayed inactivation of the  $I_{Ca}$ ,<sup>47,48</sup> which will maintain the  $I_{Ca}$  for a longer time.<sup>20</sup> Finally, prolonged APD may be also attributed to increase in  $[Ca^{2+}]_i$  through altered  $Na^+-Ca^{2+}$  exchange.<sup>33</sup> The activity of the  $Na^+-K^+$  pump is likely to be reduced in hypothermia<sup>31,32</sup> resulting in a net rise in  $[Na^+]_i$ .<sup>33</sup> The increase in  $[Na^+]_i$  may promote  $Ca^{2+}$  influx during the plateau of the action potential or reduce  $Ca^{2+}$  efflux during diastole by  $Na^+-Ca^{2+}$  exchange.<sup>49</sup> Although the activity of the  $Na^+-Ca^{2+}$  exchanger is temperature dependent, its relatively low  $Q_{10}$  (the rate of exchange produced by changing the temperature 10°C) means that this mechanism may contribute to raising diastolic free  $[Ca^{2+}]_i$ .<sup>44</sup>

We have demonstrated that hypothermia equally lengthens the APD<sub>50</sub> and APD<sub>95</sub>, indicating that low temperature similarly affects the ionic mechanisms that determine the early and late stages of repolarization (tables 1 and 2 and fig. 7), *i.e.* earlier discussed  $I_K$  and  $I_{Ca}$ . The finding that hypokalemia, similarly to hypothermia, prolongs the APD is not surprising, because low  $[K^+]_o$  decreases  $K^+$  conductance.<sup>38</sup> APD<sub>50</sub> and APD<sub>95</sub> were shorter at 6.8 mM  $[K^+]_o$  than at either 3.9 or 2.3 mM  $[K^+]_o$  (figs. 5 and 6) as a result of improved  $K^+$  conductance.<sup>8,40,45,50</sup> Interventions that affect ionic currents during the repolarization phase may selectively alter the shape and duration of the cardiac action potential. Verapamil may affect both the  $I_{Ca}$  and  $K^+$  conductance.<sup>43,51</sup> In our study, 1  $\mu$ M of verapamil significantly shortened both the APD<sub>50</sub> and the APD<sub>95</sub>, but only at 28°C and  $[K^+]_o \geq 3.9$  mM (figs. 5 and 6). At this

temperature and with 6.8 mM  $[K^+]_o$  and verapamil in the superfusate, the relative shortening of APD<sub>50</sub> exceeded that of APD<sub>95</sub> (fig. 7, C). The observation that earlier phases of repolarization (APD<sub>50</sub>) appear to be more readily affected by verapamil is consistent with the primary blocking action of this agent on  $I_{Ca}$ . At the same time less affected shortening of APD<sub>95</sub> by verapamil, and its significant shortening at higher  $[K^+]_o$  suggests that another mechanism is involved in the lengthening of APD at low temperature, presumably hypothermia-induced reduction of  $I_K$ .<sup>46</sup> Also, when  $[K^+]_o$  was sufficiently high at 28°C, both APD<sub>50</sub> and APD<sub>95</sub> were shortened, indicating not only an important role of  $[K^+]_o$  in increasing  $K^+$  conductance but also an interaction between  $Ca^{2+}$ -channel blockade and  $K^+$  conductance. Our study indicates that hypokalemia must be corrected if the APD is to be shortened with verapamil. Not only does correction of hypokalemia affect APD through increases of  $K^+$  conductance,<sup>38</sup> but in addition, as Cavalié *et al.* have shown,  $I_{Ca}$  inactivation (which is delayed by hypothermia) depends on voltage and is greater at a more depolarized potential,<sup>52</sup> as in our study at 6.8 mM.

Different arrhythmias may arise if the  $[Ca^{2+}]_i$  is increased or if cardiac action potential is lengthened. First, increase in  $[Ca^{2+}]_i$  caused by hypothermia results in oscillatory release of  $Ca^{2+}$  from sarcoplasmic reticulum; this may generate the transient inward current allowing more  $Na^+$  and  $Ca^{2+}$  into the cell creating delayed afterdepolarization.<sup>5,17,38</sup> When delayed afterdepolarization reaches certain threshold, arrhythmias may be triggered. These arrhythmias can be seen at low  $[K^+]_o$ , and when  $Na^+$  extrusion from the cell is reduced, because both may be encountered during hypothermia. By diminishing  $[Ca^{2+}]_i$  influx, verapamil reduces  $Ca^{2+}$  overload, delays afterdepolarization amplitude and reduces triggered automaticity.<sup>53,54</sup> Verapamil thus may be useful for treatment of hypothermia-induced arrhythmias based on delayed afterdepolarization. Second, reentry arrhythmias may occur during the propagation of slow action potentials through Purkinje fibers<sup>5,8,21,34,55</sup> especially *in vivo*, when, because of uneven tissue cooling, heterogeneity of repolarizations may ensue.<sup>8</sup> A shortening of APD with verapamil in hypothermia is both temperature and  $[K^+]_o$  dependent, and this may have significant clinical implications, but only at higher  $[K^+]_o$ : the lower the temperature, the longer the APD, and the greater the shortening effect of verapamil. Because the APD is very dependent on regional myocardial temperature, verapamil selectively



affects APD: a greater APD in a cooler region will be decreased more than a lesser APD in a warmer region. By reducing the regional differences in myocardial repolarization this effect may decrease the propensity for development of arrhythmogenic reentry circuits.

In conclusion, there appears to be an increased relative  $I_{Ca}$  at low temperature, as evidenced by the effective shortening of APD in deep hypothermia by verapamil. Although this shortening may result from an increase in  $I_{Ca}$ , a decrease in  $K^+$  conductance at low temperature is more likely, as evidenced by the effective shortening of APD when the  $K^+$  conductance is increased by increasing  $[K^+]_o$ . Finally, the effectiveness of verapamil to shorten APD in hypothermia was dependent on  $[K^+]_o$  suggesting that the increase in  $K^+$  conductance is an important factor for achieving this verapamil effect. Verapamil and  $K^+$  supplementation in hypothermia may have an antiarrhythmic effect primarily by reducing the dispersion of prolonged APD. Further studies will be needed to evaluate this antiarrhythmic effect *in vivo*.

The authors thank Edith Sulzer for her help in the preparation of this manuscript.

## References

1. Taylor CA: Surgical hypothermia. *Pharmacol Ther* 38:169-200, 1988
2. Davis RF: Etiology and treatment of perioperative cardiac arrhythmias, *Cardiac Anesthesia*. 3rd edition. Edited by Kaplan JA. Philadelphia, WB Saunders, 1993, pp 170-205
3. Doyle DJ, Knapp CD: Asystole from unintended myocardial hypothermia (letter). *ANESTHESIOLOGY* 80:956, 1994
4. Deleze J: Possible reasons for drop of resting potential of mammalian heart preparations during hypothermia. *Circ Res* 8:553-557, 1960
5. Atlee JL, Bosnjak ZJ: Mechanisms for cardiac dysrhythmias during anesthesia. *ANESTHESIOLOGY* 72:347-374, 1990
6. Sprung J, Cheng EY, Gamulin S, Kampine JP, Bosnjak ZJ: Effects of acute hypothermia and  $\beta$ -adrenergic receptor blockade on serum potassium concentration in rats. *Crit Care Med* 19:1545-1551, 1991
7. Koht A, Cane R, Cerullo LJ: Serum potassium levels during prolonged hypothermia. *Intensive Care Med* 9:275-277, 1983
8. Rosen MR, Legato MJ: Repolarization: Physiological and structural determinants, and pathophysiological changes. *Eur Heart J* 6(suppl):S3-S14, 1985
9. Dersham GH, Han J: Effects of verapamil on action potentials of Purkinje fibers. *J Electrocardiol* 13:67-72, 1980
10. Han J, Moe GK: Nonuniform recovery of excitability in ventricular muscle. *Circ Res* 14:44-60, 1964
11. Kuo CS, Munakata K, Reddy P, Surawicz B: Characteristics and possible mechanisms of ventricular arrhythmias dependent on the dispersion of action potential durations. *Circulation* 67:1356-1367, 1983
12. Klein R, Hadow JE, Kind C, Cockburn F: Effect of cold on muscle potentials and electrolytes. *Metabolism* 17:1094-1103, 1968
13. Corabocuf E, Weidman S: Temperature effects of the electrical activity of Purkinje fibers. *Helvetica Physiologica et Pharmacologica Acta* 12:32-41, 1954
14. Hoffman BF, Cranefield PF: The Purkinje fibers, *Electrophysiology of the Heart*. New York, Futura, 1976, pp 175-210
15. Langer GA, Brady AJ: The effects of temperature upon contraction and ionic exchange in rabbit ventricular myocardium: Relation to control of active state. *J Gen Physiol* 52:682-713, 1968
16. Vaughan-Jones RD: Excitation and contraction in heart: The role of calcium. *Br Med Bull* 42:413-420, 1986
17. Wit AL, Rosen MR: Afterdepolarization and triggered activity, *The Heart and Cardiovascular System*. Edited by Fozzard HA, Haber E, Jennings RB, Katz AM, Morgan HE. New York, Raven Press, 1986, pp 1449-1490
18. Allen DG, Eisner DA, Pirolo JS, Smith GL: The relationship between intracellular calcium and contraction in calcium-overloaded ferret papillary muscles. *J Physiol (Lond)* 364:169-182, 1985
19. Amerini S, Giotti A, Mugelli A: Effect of verapamil and diltiazem on calcium-dependent electrical activity in cardiac Purkinje fibres. *Br J Pharmacol* 85:89-96, 1985
20. Bjørnstad H, Lathrop DA, Refsum H: Prevention of some hypothermia induced electromechanical changes by calcium channel blockade. *Cardiovasc Res* 28:55-60, 1994
21. Bjørnstad H, Tande PM, Lathrop DA, Refsum H: Effects of temperature on cycle length dependent changes and restitution of action potential duration in guinea pig ventricular muscle. *Cardiovasc Res* 27:946-950, 1993
22. Hiraoka M, Hecht HH: Recovery from hypothermia in cardiac Purkinje fibers: Considerations for an electrogenic mechanism. *Pflügers Arch* 339:25-36, 1973
23. Isenberg G, Trautwein W: Temperature sensitivity of outward current in cardiac Purkinje fibers: Evidence for electrogenicity of active transport. *Pflügers Arch* 358:225-234, 1975
24. Reder RF, Miura DS, Danilo P, Rosen MR: The electrophysiological properties of normal neonatal and adult canine cardiac Purkinje fibers. *Circ Res* 48:658-668, 1981
25. Rosen MR, Ilvento JP, Gelband H, Merker C: Effects of verapamil on electrophysiologic properties of canine cardiac Purkinje fibers. *J Pharmacol Exp Ther* 189:414-422, 1974
26. Danilo P Jr, Hordof AJ, Reder RF, Rosen MR: Effects of verapamil on electrophysiologic properties of blood superfused cardiac Purkinje fibers. *J Pharmacol Exp Ther* 213:222-227, 1980
27. Kass RS, Tsien RW: Multiple effects of calcium antagonists on plateau currents in cardiac Purkinje fibers. *J Gen Physiol* 66:169-192, 1975
28. Cohen CJ, Bean BP, Tsien RW: Maximal upstroke velocity as an index of available sodium conductance. *Circ Res* 54:636-651, 1984
29. Hondeghem LM, Katzung BG: Time- and voltage-dependent interactions of antiarrhythmic drugs with cardiac sodium channels. *Biochim Biophys Acta* 472:373-398, 1977
30. Gettes LS, Reuter H: Slow recovery from inactivation of inward currents in mammalian myocardial fibers. *J Physiol (Lond)* 240:703-724, 1974
31. Isenberg G, Trautwein W: Temperature sensitivity of outward current in cardiac Purkinje fibers: Evidence for electrogenicity of active transport. *Pflügers Arch* 358:225-235, 1975



32. Eisner DA, Lederer WJ: Characterization of the electrogenic sodium pump in cardiac Purkinje fibers. *J Physiol (Lond)* 303:441-474, 1980
33. Chapman RA: Sodium/calcium exchange and intracellular calcium buffering in ferret myocardium: An ion-sensitive microelectrode study. *J Physiol (Lond)* 373:163-179, 1986
34. Cranefield PF, Aronson RS, Witt AL: Effect of verapamil on the normal action potential and on a calcium-dependent slow response of canine cardiac Purkinje fibers. *Circ Res* 34:204-213, 1974
35. Shigenobu K, Schneider JA, Sperelakis N: Verapamil blockade of slow  $\text{Na}^+$  and  $\text{Ca}^{++}$  responses in myocardial cells. *J Pharmacol Exp Ther* 190:280-288, 1974
36. Bayer R, Kalusche D, Kaufmann R, Mannhold R: Inotropic and electrophysiological actions of verapamil and D600 in mammalian myocardium. *Naunyn Schmiedeberg Arch Pharmacol* 290:81-97, 1975
37. Galper JB, Catterall WA: Inhibition of sodium channels by D600. *Mol Pharmacol* 15:174-178, 1979
38. Lynch C III: Cellular electrophysiology of the heart, *Clinical Cardiac Electrophysiology: Perioperative Considerations*. A Society of Cardiovascular Anesthesiologists Monograph. Edited by Lynch C III. Philadelphia, JB Lippincott, 1994, pp 1-52
39. Eisner DA, Lederer WS: A cellular basis for lidocaine's antiarrhythmic action. *J Physiol (Lond)* 295(suppl):25P-26P, 1979
40. Rosen M, Danilo P: Effects of tetrodotoxin, lidocaine, verapamil and AHR-2666 on ouabain-induced delayed afterdepolarization in canine Purkinje fibers. *Circ Res* 46:117-124, 1980
41. Fozzard HA, Wasserstrom JA: Voltage dependence of intracellular sodium and control of contraction, *Cardiac Electrophysiology*. Edited by Zipes DP, Jalife J. Orlando, Grune and Stratton, 1985, pp 51-57
42. Siegelbaum SA, Tsien RW: Calcium-activated transient outward current in calf cardiac Purkinje fibers. *J Physiol (Lond)* 299:485-506, 1980
43. Bassingthwaight JB, Fry CH, McGuigan JAS: Relationship between internal calcium and outward current in mammalian ventricular muscle: a mechanism for the control of the action potential duration? *J Physiol (Lond)* 262:15-37, 1976
44. Reuter H, Seitz N: The dependence of calcium efflux from cardiac muscle on temperature and on external ion composition. *J Physiol (Lond)* 195:451-470, 1968
45. Carmeliet E:  $\text{K}^+$  channels in cardiac cells: Mechanisms of activation inactivation, rectification and  $\text{K}^+$  sensitivity. *Pflügers Arch* 414(suppl):S88-S92, 1989
46. Egan TM, Noble SJ, Powell T, Spindler AJ, Twist VW: Sodium calcium exchange during the action potential in guinea-pig ventricular cells. *J Physiol (Lond)* 411:639-661, 1989
47. Cavalié A, McDonald TF, Trautwein W: Temperature-induced transitory and steady-state changes in the calcium current of guinea pig ventricular myocyte. *Pflügers Arch* 405:294-296, 1985
48. Arreola J, Dirksen RT, Shieh RC, Williford DJ, Sheu SS: Calcium current and  $\text{Ca}^{+2}$  transients under action potential clamp in guinea pig ventricular myocytes. *Am J Physiol* 261:393-397, 1991
49. Shattock MJ, Bers DM: Inotropic response to hypothermia and the temperature-dependence on ryanodine action in isolated rabbit and rat ventricular muscle: Implications for excitation-contraction coupling. *Circ Res* 61:761-771, 1987
50. Scamps F, Carmeliet E: Delayed  $\text{K}^+$  current and external  $\text{K}^+$  in single cardiac Purkinje cells. *Am J Physiol* 257:C1080-C1091, 1989
51. Posner P, Miller L, Lambert CR: The effect of verapamil on potassium fluxes in canine cardiac Purkinje fibers. *Eur J Pharmacol* 34:369-372, 1974
52. Cavalié A, Ochi R, Pelzer D, Trautwein W: Elementary currents through  $\text{Ca}^{2+}$  channels in guinea-pig myocytes. *Pflügers Arch* 398:284-297, 1983
53. Ferrier GR: Digitalis arrhythmias: Role of oscillatory afterpotentials. *Prog Cardiovasc Dis* 19:459-474, 1977
54. Gallager JD, Bianchi JJ, Gessman LJ: Halothane antagonizes ouabain toxicity in isolated canine Purkinje fibers. *ANESTHESIOLOGY* 71:695-703, 1989
55. Han J: Mechanisms of ventricular arrhythmias associated with myocardial infarction. *Am J Cardiol* 24:857-864, 1969
